# Supplementary material for: Real-world measurement and mechanical-analysis-based-verification of NO x and CO 2 emissions from in-use heavy-duty vehicle
Source: Copernicus journal article supplement (doi:10.5194/amt-2020-286), 2020-09-07
Supplement: Supplementary file 1 [file amt-2020-286-supplement.zip]

Archive with 2 entries (2 files):
- AMT_supplementary_data_cor1.xlsx
- amt-2020-286-supplement-version1.pdf
