# Supplementary material for: Real-world measurement and mechanical-analysis-based-verification of NO x and CO 2 emissions from in-use heavy-duty vehicle
Source: Copernicus journal article supplement (doi:10.5194/amt-2020-286), 2020-09-07
Supplement: Supplementary file 1 [file amt-2020-286-supplement.zip › amt-2020-286-supplement-version1.pdf]

## Supplementary Information

# Real-world measurement and mechanical-analysis-based-verification of NO<sub>x</sub> and CO<sub>2</sub> emissions from in-use heavy-duty vehicle

Hiroo Hata<sup>a,\*</sup>, Kazuo Kokuryo<sup>b</sup>, Takehiko Ogata<sup>b</sup>, Masahiko Kugata<sup>a</sup>, Koichi Yanai<sup>a</sup>, Megumi Okada<sup>a</sup>, Chikage Funakubo<sup>a</sup>, Minoru Yamazaki<sup>a</sup>, and Junya Hoshi<sup>a</sup>

<sup>a</sup> Tokyo Metropolitan Research Institute for Environmental Protection 1-7-5, Sinsuna, Koto-ku, Tokyo 136-0075, Japan

<sup>b</sup> Modern Planning Inc. 5-49-10 Chuo, Nakano-ku, Tokyo 164-0011, Japan

\*Corresponding author. E-mail: hata-h@tokyokankyo.jp; Tel: +81-3-3699-1369

### 1 Contents (5 pages, 5 Figures, and 1 Table)

|           |                                                                                                 |
|-----------|-------------------------------------------------------------------------------------------------|
| Text S1   | Relationship between EGR and coolant and ambient temperatures                                   |
| Figure S1 | Relationship between EGR ratio and engine coolant temperature                                   |
| Figure S2 | Time profile of engine coolant temperature in four seasons, measured through real-world driving |
| Text S2   | Relationship between urea-SCR and catalysis and ambient temperatures                            |
| Figure S3 | Relationship between the amount of urea injection and urea-SCR surface temperature              |
| Figure S4 | Time profile of SCR surface temperature in four seasons, measured through real-world driving    |
| Text S3   | Vehicle speed and acceleration distribution obtained through PEMS and WHVC                      |
| Figure S5 | Distribution of vehicle speed and acceleration determined via PEMS                              |
| Text S4   | Additional information pertaining to the chassis dynamometer experiment                         |
| Table S1  | Gaseous pollutants measured in chassis dynamometer tests                                        |

3    **Text S1**    *Relationship between EGR and coolant and ambient temperatures*

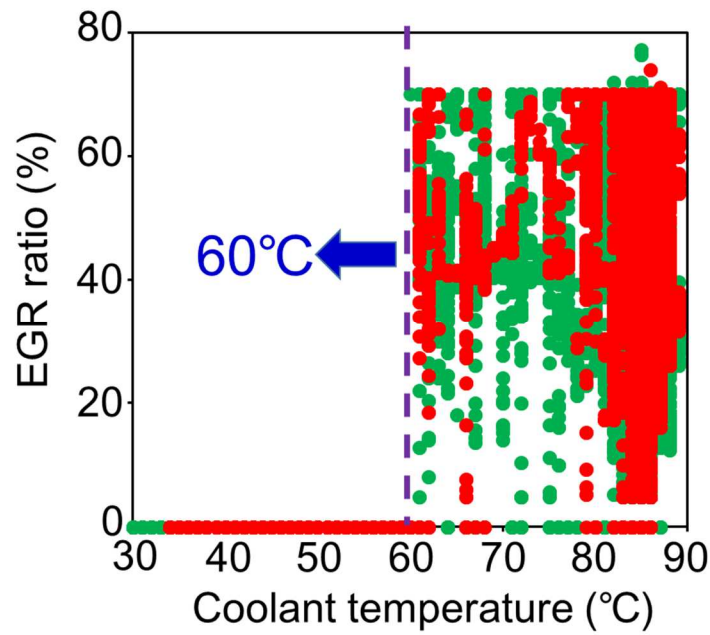

4  
5    Figure S1: Relationship between EGR ratio and engine coolant temperature. The green and  
6    red plots correspond to measurements obtained in spring and summer, respectively.

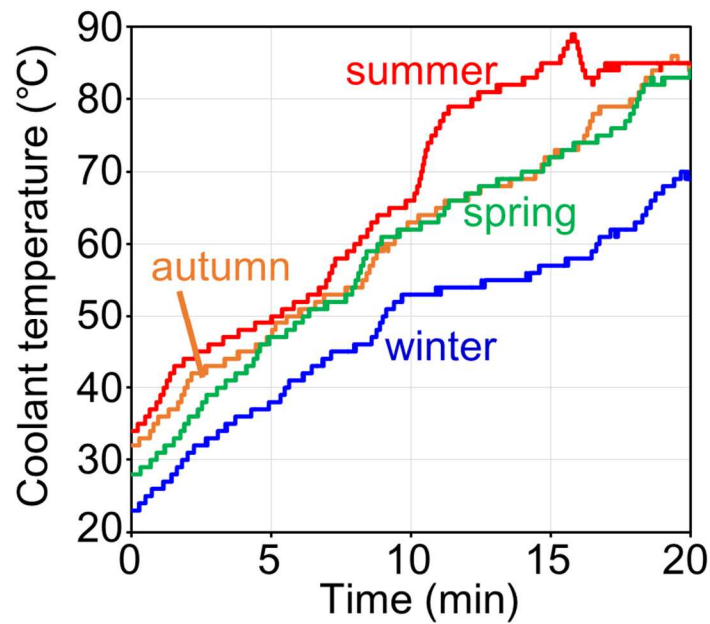

8  
9    Figure S2: Time profile of engine coolant temperature in four seasons, measured through real-  
10    world driving.

**Text S2 Relationship between urea-SCR and catalysis and ambient temperatures**

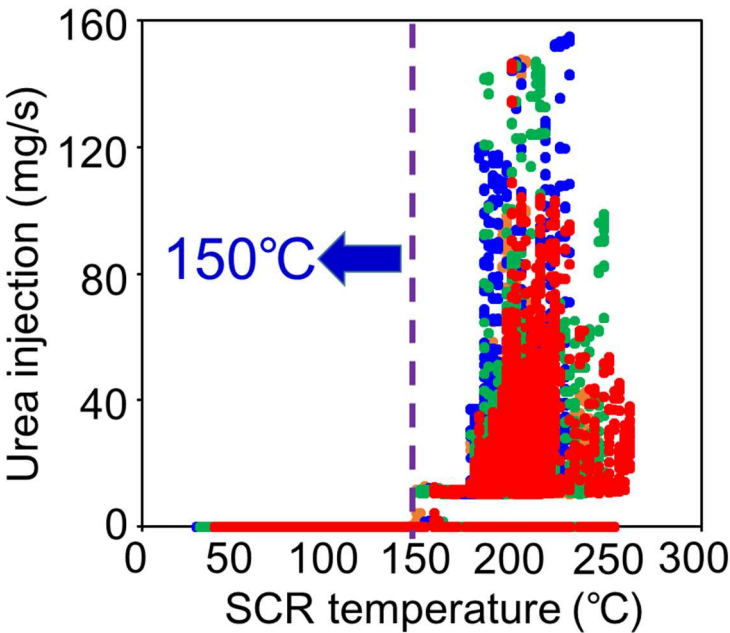

Figure S3: Relationship between the amount of urea injection and urea-SCR surface temperature (■: autumn, ■: winter, ■: spring, ■: summer).

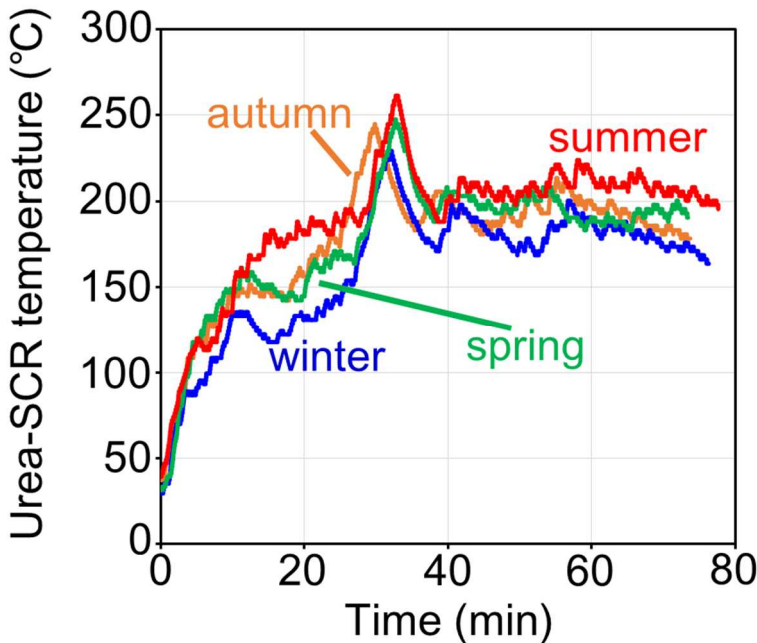

Figure S4: Time profile of SCR surface temperature in four seasons, measured through real-world driving.

**Text S3** *Vehicle speed and acceleration distribution obtained through PEMS and WHVC*

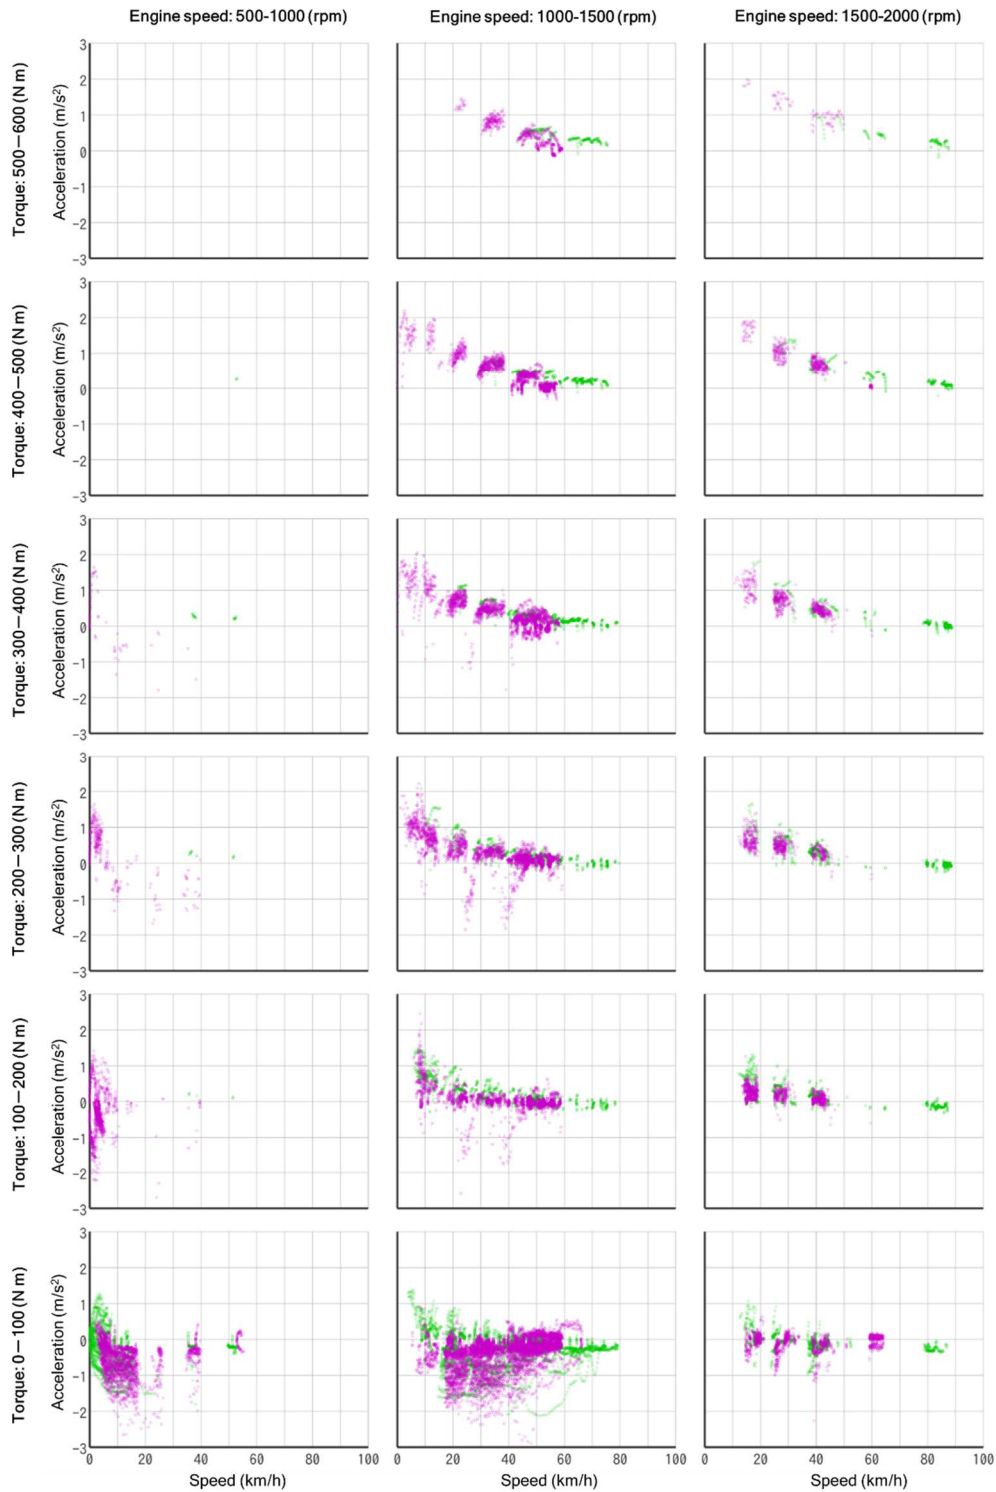

Figure S5: Distribution of vehicle speed and acceleration determined via PEMS (●) results and WHVC (●) divided into three engine-rotation and six engine-torque ranges.

**Text S4** *Additional information pertaining to the chassis dynamometer experiment*

Table S1: Gaseous pollutants measured in chassis dynamometer tests (g/km).

| Mode           | Month, Year | CO    | THC   | NO <sub>x</sub> | CO <sub>2</sub> | CH <sub>4</sub> | N <sub>2</sub> O |
|----------------|-------------|-------|-------|-----------------|-----------------|-----------------|------------------|
| WHVC<br>(cold) | Nov 2018    | 0.032 | 0.001 | 0.396           | 473.8           | 0.001           | 0.035            |
|                | Jan 2019    | 0.032 | 0.002 | 0.349           | 465.1           | 0.001           | 0.030            |
|                | Jun 2019    | 0.023 | 0.001 | 0.377           | 466.9           | 0.001           | 0.034            |
|                | Aug 2019    | 0.016 | 0.000 | 0.352           | 463.1           | 0.001           | 0.027            |
| WHVC<br>(hot)  | Nov 2018    | 0.016 | 0.000 | 0.018           | 434.9           | 0.001           | 0.036            |
|                | Jan 2019    | 0.006 | 0.000 | 0.008           | 438.5           | 0.001           | 0.039            |
|                | Jun 2019    | 0.007 | 0.000 | 0.028           | 442.6           | 0.001           | 0.044            |
|                | Aug 2019    | 0.007 | 0.000 | 0.020           | 440.1           | 0.001           | 0.040            |
