# Supplementary material for: Real-world measurement and mechanical-analysis-based-verification of NO x and CO 2 emissions from in-use heavy-duty vehicle
Source: Copernicus journal article supplement (doi:10.5194/amt-2020-286), 2020-09-07
Supplement: Supplementary file 1 [file amt-2020-286-supplement.zip › AMT_supplementary_data_cor1.xlsx]

## Sheet: VOC_MdTL
Chemical type	Compounds	M.W.	MIR	2018-11-01		2019-06-01		2019-08-01		unit: (mg/km)
				WHVC	WHVC cold	WHVC	WHVC cold	WHVC	WHVC cold
Alkane	ethane	30.07	0.28	0.0984645	0.141739	0.256211	0.134909	0.108608	0.153549
Alkane	propane	44.1	0.49	0.041731	0.0391311	0.226151	0.0414325	0.0291694	0.0319934
Alkane	n-butane	58.12	1.15	0.0443795	0.0163719	0.256336	0.0211682	0.0158431	0.0121136
Alkane	2-methylpropane(isobutane)	58.12	1.23	0.0201477	0.00791307	0.126834	0.00938138	0.00652363	0.0065227
Alkane	2,2-dimethylbutane	86.18	1.17	N.D.	N.D.	N.D.	0.00677699	N.D.	N.D.
Alkane	n-pentane	72.15	1.31	0.00642183	0.00914579	0.0882089	N.D.	0.00694149	0.00896482
Alkane	n-hexane	86.18	1.24	0.0218006	0.0202301	0.0176202	0.175132	0.00621848	0.0100172
Alkane	n-heptane	100.2	1.07	0.00516333	0.0239916	0.0459906	0.107825	0.0112469	0.0357439
Alkane	2-methylbutane(isopentane)	72.15	1.45	0.0236594	0.0386156	0.0921226	0.0167225	0.00954456	0.0133026
Alkane	2,3-dimethylbutane	86.18	0.97	N.D.	N.D.	N.D.	0.0064203	N.D.	N.D.
Alkane	2-methylpentane	86.18	1.5	0.00161486	0.00687823	0.00755152	0.0592095	0.0024183	0.00414507
Alkane	3-methylpentane	86.18	1.8	0.00242229	0.00525982	0.0107879	0.0399486	0.00207283	0.00449049
Alkane	2,4-dimethylpentane	100.2	1.55	N.D.	N.D.	N.D.	0.00248826	N.D.	N.D.
Alkane	cyclopentane	70.13	2.39	0.00295676	0.001317	0.00234101	0.0142225	0.00112453	0.000843274
Alkane	methylcyclopentane	84.16	2.19	0.0930437	0.0102731	0.00877919	0.0250793	0.0553293	0.00775849
Alkane	n-octane	114.23	0.9	0.00214047	0.0262783	0.0795986	0.122922	0.00732665	0.0604363
Alkane	n-nonane	128.26	0.78	0.00240337	0.0198713	0.115599	0.18845	0.00462742	0.0801972
Alkane	n-decane	142.28	0.68	0.0033326	0.00801579	0.0374018	0.181961	0.00342216	0.0188192
Alkane	n-undecane	156.31	0.61	0.00366122	0.00660466	0.0208711	0.139739	0.00438622	0.0100242
Alkane	2-methylhexane	100.2	1.19	N.D.	0.00987889	0.00836193	0.0161737	0.00241004	0.00883556
Alkane	2,3-dimethylpentane	100.2	1.34	N.D.	0.00235212	0.00292667	0.00497652	N.D.	0.00281131
Alkane	3-methylhexane	100.2	1.61	0.00187757	0.00893805	0.00961622	0.0190767	0.00200837	0.0100404
Alkane	2,2,4-trimethylpentane	114.23	1.26	N.D.	N.D.	0.000953276	0.00283667	N.D.	0.000915701
Alkane	2,3,4-trimethylpentane	114.23	1.03	N.D.	N.D.	N.D.	0.00189111	0.0279329	0.0270132
Alkane	2-methylheptane	114.23	1.07	N.D.	0.00804438	0.0162057	0.0193839	N.D.	0.012362
Alkane	3-methylheptane	114.23	1.24	N.D.	0.00643551	0.0109627	0.0122922	N.D.	0.0105306
Alkane	cyclohexane	84.16	1.25	0.00827931	0.0138291	0.0242306	0.0606082	0.0114707	0.0209142
Alkane	methylcyclohexane	98.19	1.7	N.D.	0.0207444	0.0413806	0.0938763	0.00629786	0.0354204
Alkene and Alkine	ethylene	28.05	9	0.0212871	0.821485	0.0579358	0.882198	0.0265369	0.958228
Alkene and Alkine	propene (propylene)	42.08	11.66	0.00512529	0.0462288	0.0184363	0.0534676	0.0038798	0.0519481
Alkene and Alkine	1-butene	56.11	9.73	0.00262851	0.00790283	0.00632139	0.00719911	N.D.	0.0074216
Alkene and Alkine	1-pentene	70.13	7.21	N.D.	0.00296325	0.00292626	0.00464409	N.D.	0.00224873
Alkene and Alkine	3-methyl-1-butene	70.13	6.99	0.0022997	0.00428024	N.D.	0.00145128	N.D.	N.D.
Alkene and Alkine	1-hexene	84.16	5.49	N.D.	N.D.	N.D.	N.D.	N.D.	N.D.
Alkene and Alkine	1-heptene	98.19	4.43	N.D.	0.00783678	0.00655535	N.D.	N.D.	0.00708408
Alkene and Alkine	c-2-butene	56.11	14.24	N.D.	N.D.	0.013111	N.D.	N.D.	N.D.
Alkene and Alkine	t-2-butene	56.11	15.16	N.D.	0.00263428	0.00585314	0.00418013	N.D.	0.00427305
Alkene and Alkine	2-methylpropene(isobutene)	56.11	6.29	0.0107769	0.00974683	0.0161547	0.0118437	0.00404872	0.00877099
Alkene and Alkine	c-2-pentene	70.13	10.38	N.D.	0.000987749	N.D.	0.00435383	N.D.	N.D.
Alkene and Alkine	t-2-pentene	70.13	10.56	N.D.	N.D.	0.00409676	N.D.	N.D.	N.D.
Alkene and Alkine	2-methyl-1-pentene	70.13	6.4	N.D.	0.000658499	N.D.	0.00667588	N.D.	N.D.
Alkene and Alkine	2-methyl-2-butene	70.13	14.08	N.D.	0.000658499	0.000585251	0.00609537	N.D.	N.D.
Alkene and Alkine	c-1,3-pentadiene	68.12	12.5	N.D.	N.D.	N.D.	N.D.	0.000819221	0.00109214
Alkene and Alkine	t-1,3-pentadiene	68.12	12.5	N.D.	N.D.	N.D.	N.D.	N.D.	N.D.
Alkene and Alkine	c-2-hexene	84.16	8.31	N.D.	N.D.	N.D.	0.00104497	N.D.	N.D.
Alkene and Alkine	t-2-hexene	84.16	8.62	0.00354828	N.D.	N.D.	N.D.	0.00134949	N.D.
Alkene and Alkine	2-methyl-1-pentene	84.16	5.26	N.D.	N.D.	N.D.	0.00278659	N.D.	N.D.
Alkene and Alkine	c-3-hexene	84.16	7.61	N.D.	0.00316095	N.D.	N.D.	N.D.	N.D.
Alkene and Alkine	c-3-methyl-2-pentene	84.16	12.49	N.D.	N.D.	N.D.	N.D.	N.D.	N.D.
Alkene and Alkine	t-3-methyl-2-pentene	84.16	13.17	N.D.	N.D.	0.0010535	0.0125396	N.D.	N.D.
Alkene and Alkine	1,3-butadiene	54.09	12.61	N.D.	0.00152367	0.00203127	0.00201482	N.D.	N.D.
Alkene and Alkine	2-methyl-1,3-butadiene(isoprene)	68.12	10.61	N.D.	N.D.	0.00227391	0.0451098	0.000546148	0.00054607
Aromatic	benzene	78.11	0.72	0.00841596	0.0964459	0.110162	0.0530185	0.00563618	0.0763906
Aromatic	toluene	92.14	4	0.031941	0.0337415	0.0419067	0.463341	0.0188375	0.0291755
Aromatic	ethylbenzene	106.17	3.04	0.00447624	0.00498452	0.00797412	0.148523	0.00553287	0.014043
Aromatic	isopropylbenzene (cumene)	120.19	2.52	N.D.	N.D.	N.D.	0.00596934	N.D.	N.D.
Aromatic	propylbenzene	120.19	2.03	N.D.	N.D.	0.00150452	0.0159182	N.D.	0.00144522
Aromatic	o-xylene	106.17	7.64	0.00198944	0.00299071	0.00487308	0.0540485	0.00383045	0.00893644
Aromatic	m-xylene	106.17	9.75	N.D.	N.D.	0.00753112	0.10546	0.00510727	0.0127663
Aromatic	p-xylene	106.17	5.84	N.D.	N.D.	N.D.	0.0386688	N.D.	N.D.
Aromatic	1,2,4-trimethylbenzene	120.19	8.87	0.00281519	0.00394991	0.00952863	0.108443	0.00385446	0.0086713
Aromatic	styrene	104.15	1.73	N.D.	N.D.	N.D.	0.0344847	N.D.	N.D.
Aromatic	1,3,5-trimethylbenzene	120.19	11.76	0.00112608	N.D.	0.00200603	0.0253697	0.000963615	0.00289043
Aromatic	o-ethyltoluene	120.19	5.59	0.00112608	0.00112855	0.00200603	0.026862	0.000963615	0.0024087
Aromatic	m-ethyltoluene	120.19	7.39	0.00168911	0.00225709	0.00351055	0.0482522	0.00144542	0.00385391
Aromatic	p-ethyltoluene	120.19	4.44	0.00112608	0.000564274	0.00200603	0.0238774	0.000481808	0.00144522
Aromatic	1,2,3-trimethylbenzene	120.19	11.97	N.D.	0.00112855	0.00250753	0.0283544	0.00144542	0.00337217
Aromatic	m-diethylbenzene	134.22	7.1	N.D.	N.D.	N.D.	0.00666615	N.D.	0.00107595
Aromatic	p-diethylbenzene	134.22	4.43	N.D.	N.D.	N.D.	N.D.	N.D.	0.00107595
Aromatic	2-ethyl-p-xylene	134.22	7.55	N.D.	N.D.	0.0011201	0.00777718	N.D.	0.00107595
Aromatic	4-ethyl-m-xylene	134.22	7.55	N.D.	0.00126028	0.0011201	0.00777718	N.D.	0.00107595
Aromatic	1,2,3,5-tetramethylbenzene	134.22	9.26	0.00125752	0.00252057	0.00168015	0.0116658	0.00161415	0.00268987
Alkene and Alkine	acetylene	26.04	0.95	0.00304965	0.00232282	0.0194492	0.00334102	0.00125264	0.00166995
Aldehyde and Ketone	Formaldehyde	30.031	9.46	0.0367249	0.3351	0.0465201	0.344161	0.0448429	0.352652
Aldehyde and Ketone	Acetaldehyde	44.0526	6.54	0.0107667	0.130161	0.0171912	0.137764	0.0129895	0.12496
Aldehyde and Ketone	Propionaldehyde	58.08	7.08	0.00343988	0.0030006	0.004254	0.00340257	0.00268668	0.00200073
Aldehyde and Ketone	n-Butyl,iso-Butylaldehyde	72.11	5.97	0.00201739	0.00160647	0.00252164	0.00263582	0.00253381	N.D.
Aldehyde and Ketone	iso-Valeraldehyde	86.13	4.97	0.00370817	0.0098193	0.0180186	0.0171847	0.0144695	0.014781
Aldehyde and Ketone	Valeraldehyde	86.13	5.08	N.D.	N.D.	N.D.	N.D.	N.D.	N.D.
Aldehyde and Ketone	Hexaldehyde	100.16	4.35	N.D.	N.D.	N.D.	N.D.	N.D.	N.D.
Aldehyde and Ketone	Benzaldehyde	106.121		N.D.	N.D.	N.D.	0.00202281	N.D.	N.D.
Aldehyde and Ketone	o-Tolualdehyde	120.15		N.D.	N.D.	N.D.	N.D.	N.D.	N.D.
Aldehyde and Ketone	m-,p-Tolualdehyde	120.15		N.D.	N.D.	N.D.	N.D.	N.D.	N.D.
Aldehyde and Ketone	2,5-Dimethylbenzaldehyde	134.18		N.D.	N.D.	N.D.	N.D.	N.D.	N.D.
Aldehyde and Ketone	Acetone	58.08	0.36	0.0328668	0.383011	0.0536361	0.379399	0.0393119	0.359914
Aldehyde and Ketone	methyl ethyl ketone	72.11	1.48	0.00709388	0.0226825	0.0517526	0.189516	0.00260162	0.0413309
Aldehyde and Ketone	methyl isobutyl ketone	100.16	3.88	N.D.	0.00564283	0.00626894	0.0385526	0.00401513	0.0108393
Aldehyde and Ketone	acetic acid, methyl ester	74.08	0.072	N.D.	N.D.	0.00309108	0.0134906	N.D.	N.D.
Aldehyde and Ketone	ethyl acetate	88.11	0.63	0.00701687	0.00579128	0.0113971	0.342427	0.00105962	0.0024721
Aldehyde and Ketone	acetic acid, butyl ester	116.16	0.83	0.00707407	0.00763495	0.0819128	0.177883	0.00279392	N.D.
Aldehyde and Ketone	isobutyl alcohol	74.12	2.51	N.D.	N.D.	0.00432984	0.115959	N.D.	0.00445626
Aldehyde and Ketone	isopropyl alcohol	60.1	0.61	0.0351928	0.0330127	0.0273344	0.133078	0.0342112	0.0363743
Aldehyde and Ketone	n-propyl alcohol	60.1	2.5	N.D.	N.D.	N.D.	0.0159196	N.D.	N.D.
Aldehyde and Ketone	1-butanol	74.12	2.88	N.D.	N.D.	0.0244327	0.209524	0.0466488	0.0407005
Aldehyde and Ketone	MTBE	88.15	0.73	N.D.	N.D.	N.D.	N.D.	N.D.	N.D.
Aldehyde and Ketone	ETBE	102.17	2.01	N.D.	N.D.	N.D.	N.D.	N.D.	N.D.
Aldehyde and Ketone	Acrolein	56.07	7.45	N.D.	0.00217691	N.D.	0.0020233	N.D.	0.00209139
Aldehyde and Ketone	Crotonaldehyde	70.09	9.39	N.D.	N.D.	N.D.	N.D.	N.D.	N.D.
